# Supplementary material for: vi-HMM: a novel HMM-based method for sequence variant identification in short-read data
Source: PubMed Central journal article supplement (PMC6387560; doi:10.1186/s40246-019-0194-6), 2019-02-13
Supplement: 40246_2019_194_MOESM1_ESM.pdf [file 40246_2019_194_MOESM1_ESM.pdf]

# Additional file 1:

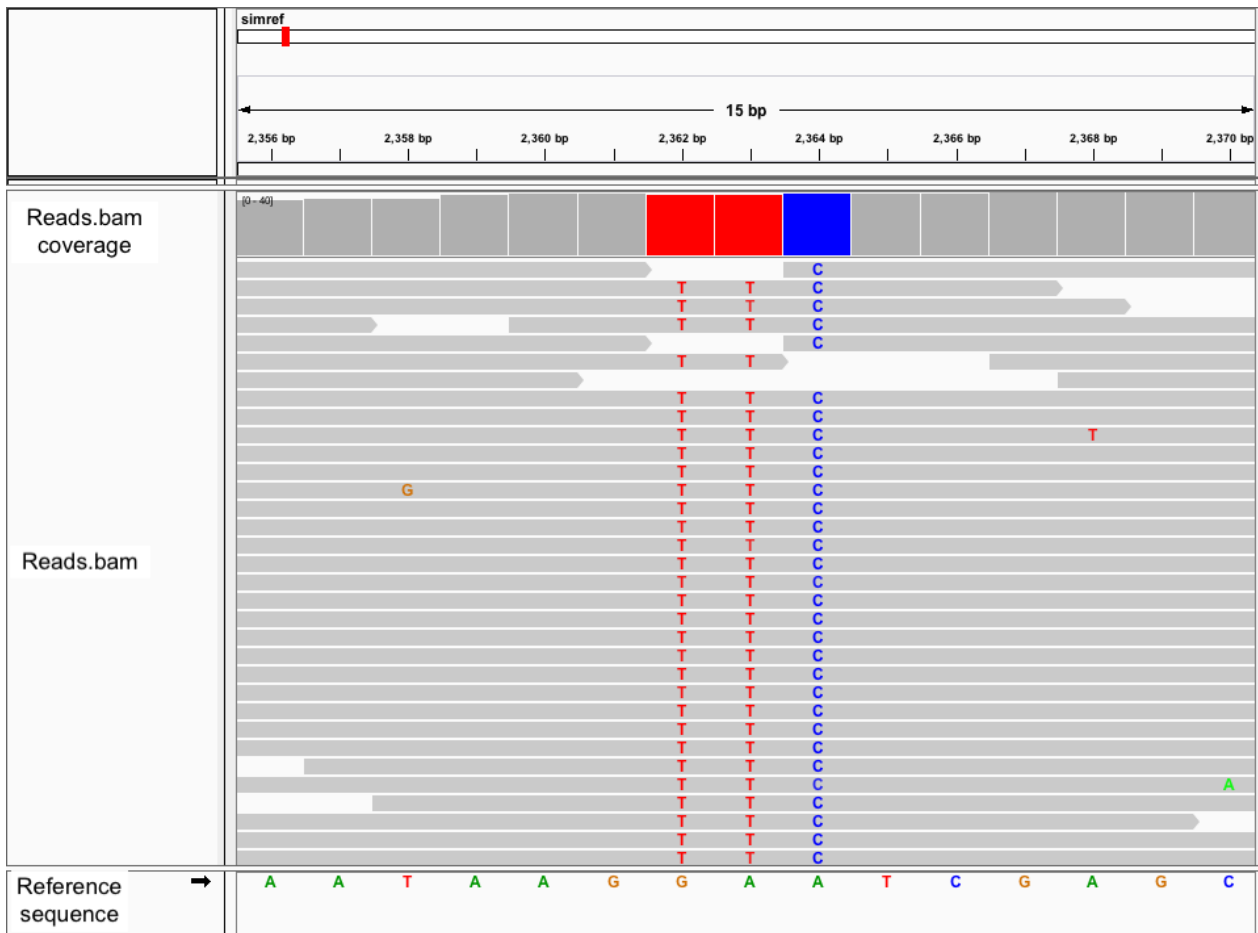

Figure 1: SNPs in IGV viewer. This figure illustrates a view of a section of mapped reads in the dataset simulated by HMM. It shows three SNPs at base 2362 (G → T), 2363 (A → T) and 2364G (A → C).
