# Supplementary material for: vi-HMM: a novel HMM-based method for sequence variant identification in short-read data
Source: PubMed Central journal article supplement (PMC6387560; doi:10.1186/s40246-019-0194-6), 2019-02-13
Supplement: 40246_2019_194_MOESM3_ESM.pdf [file 40246_2019_194_MOESM3_ESM.pdf]

### Additional file 3:

Comparison of different variant callers using real data on chromosome 22.

| Caller     | SNP         |           |             | INDEL       |           |             |
|------------|-------------|-----------|-------------|-------------|-----------|-------------|
|            | Sensitivity | Precision | $F_1$ score | Sensitivity | Precision | $F_1$ score |
| <b>15X</b> |             |           |             |             |           |             |
| vi-HMM     | 94.19%      | 99.36%    | 96.71%      | 89.79%      | 77.72%    | 83.32%      |
| FreeBayes  | 94.75%      | 82.48%    | 88.19%      | 87.83%      | 63.83%    | 73.93%      |
| Platypus   | 90.87%      | 99.86%    | 95.15%      | 92.84%      | 62.41%    | 74.64%      |
| SAMtools   | 98.53%      | 99.58%    | 99.05%      | 77.99%      | 90.62%    | 83.83%      |
| VarScan    | 72.47%      | 99.94%    | 84.02%      | 64.60%      | 98.50%    | 78.03%      |
| <b>30X</b> |             |           |             |             |           |             |
| vi-HMM     | 99.80%      | 99.24%    | 99.52%      | 94.01%      | 89.89%    | 91.90%      |
| FreeBayes  | 95.86%      | 90.15%    | 92.92%      | 89.66%      | 67.88%    | 77.27%      |
| Platypus   | 93.26%      | 99.59%    | 96.32%      | 95.78%      | 61.21%    | 74.69%      |
| SAMtools   | 99.74%      | 99.64%    | 99.69%      | 82.15%      | 88.24%    | 85.09%      |
| VarScan    | 97.69%      | 99.87%    | 98.77%      | 84.29%      | 98.42%    | 90.81%      |
| <b>50X</b> |             |           |             |             |           |             |
| vi-HMM     | 99.96%      | 98.55%    | 99.25%      | 93.88%      | 89.98%    | 91.90%      |
| FreeBayes  | 95.94%      | 92.98%    | 94.44%      | 89.54%      | 70.12%    | 78.65%      |
| Platypus   | 93.37%      | 99.44%    | 96.31%      | 96.33%      | 60.49%    | 74.32%      |
| SAMtools   | 99.80%      | 99.66%    | 99.73%      | 83.67%      | 85.34%    | 84.50%      |
| VarScan    | 99.58%      | 99.84%    | 99.71%      | 88.93%      | 99.17%    | 93.32%      |
