# Supplementary material for: vi-HMM: a novel HMM-based method for sequence variant identification in short-read data
Source: PubMed Central journal article supplement (PMC6387560; doi:10.1186/s40246-019-0194-6), 2019-02-13
Supplement: 40246_2019_194_MOESM4_ESM.pdf [file 40246_2019_194_MOESM4_ESM.pdf]

## Additional file 4:

Bowtie2 and BWA-MEM are compared on correct mapping, multiple alignment, second alignment, and soft/hard clipped reads. We do not list the average percentages of hard clipped reads because all of them are zeros for both aligners.

Table 5.1: The average percentage of correct mapping by Bowtie2 and BWA-MEM using simulated data at various sequencing depths.

| Mapper  | 15X    | 20X    | 25X    | 30X    |
|---------|--------|--------|--------|--------|
| Bowtie2 | 96.31% | 95.79% | 96.35% | 95.90% |
| BWA-MEM | 94.69% | 94.62% | 94.65% | 94.61% |

Table 5.2: The average percentage of multiple alignment by Bowtie2 and BWA-MEM using simulated data at various sequencing depths.

| Mapper  | 15X   | 20X   | 25X   | 30X   |
|---------|-------|-------|-------|-------|
| Bowtie2 | 3.15% | 3.21% | 3.15% | 3.23% |
| BWA-MEM | 0     | 0     | 0     | 0     |

Table 5.3: The average percentage of soft clipped reads by Bowtie2 and BWA-MEM using simulated data at various sequencing depths.

| Mapper  | 15X   | 20X   | 25X   | 30X   |
|---------|-------|-------|-------|-------|
| Bowtie2 | 0     | 0     | 0     | 0     |
| BWA-MEM | 8.68% | 8.74% | 8.71% | 8.76% |
