# Supplementary material for: vi-HMM: a novel HMM-based method for sequence variant identification in short-read data
Source: PubMed Central journal article supplement (PMC6387560; doi:10.1186/s40246-019-0194-6), 2019-02-13
Supplement: 40246_2019_194_MOESM5_ESM.pdf [file 40246_2019_194_MOESM5_ESM.pdf]

## Additional file 5:

We test the performance of vi-HMM with homopolymers on a simulated dataset with  $30\times$  coverage depth. vi-HMM produces high calling accuracies of SNPs and INDELS, which are only slightly smaller than those in the general situation. One potential explanation for the lower INDEL calling accuracy is that the INDELS are redundant in the output[1].

SNP and INDEL callings by vi-HMM using simulated data with homopolymers at  $30\times$  depths.

| Caller  | SNP         |           |             | INDEL       |           |             |
|---------|-------------|-----------|-------------|-------------|-----------|-------------|
|         | Sensitivity | Precision | $F_1$ score | Sensitivity | Precision | $F_1$ score |
| Bowtie2 | 88.39%      | 87.46%    | 87.92%      | 59.16%      | 57.47%    | 58.30%      |
| BWA-MEM | 79.76%      | 88.52%    | 83.91%      | 58.13%      | 53.14%    | 55.52%      |

## References

- [1] Hasan, M.S., Wu, X., Watson, L.T., Li, Z., Zhang, L.: Ups-indel: A better approach for finding indel redundancy. In: Computational Advances in Bio and Medical Sciences (ICCABS), 2016 IEEE 6th International Conference On, pp. 1–1 (2016). IEEE
